# Supplementary material
Source: publisher figshare collection journal article supplement (https://gsapubs.figshare.com/ndownloader/files/39510949)
Supplement: Supplementary file 1 [file 39510949]

## Sheet: Supplementary table S1
		Position relative to top of seam			Position relative to K-Pg (base Ir-Clay = 0)				Run 1																												Run 2
Site	Laboratory ID	Top	Bottom	Midpoint	Top	Bottom	Midpoint	Lithology	1302	1300	1298	1296	Cren	Cren'	Σ isoGDGT	Ia 1022	Ib 1020	Ic 1018	Iia 1036	IIa' 1036	Iib 1034	IIb' 1034	IIc 1032	IIc' 1032	IIIa 1050	IIIa' 1050	IIIb 1048	IIIb' 1048	Σ brGDGT	%cren	iso/br	BIT Index	MBT'5me	MAAT	CBT	CBT-pH	1302	1300	1298	1296	Cren	Cren'	Σ isoGDGT	Ia 1022	Ib 1020	Ic 1018	Iia 1036	IIa' 1036	Iib 1034
Rock Creek West	RCW1	0	4	2	80.5	76.5	78.5	Shaley Coal/Coal	4.32123e+07	4.32123e+07	6.68412e+06	1.39813e+06	2.84716e+06	22656	9.73767e+07	63320935	12763912	3472752	15260489	4172640	1735557	828305	545502		2791241	1404297			106295630	2.92386	0.916093	0.968293	0.796449	18.5087	-0.590234	6.60032	4.4627e+07	6.74877e+06	6.78662e+06	1.33956e+06	2.74762e+06	30614.9	6.22802e+07	70581714	12698517	3341139	14683356	4252188	1794816
Rock Creek West	RCW2a	4	6	5	76.5	74.5	75.5	Coal	9.87958e+06	1.4354e+06	1.50432e+06	1.07584e+06	336944	0	1.42321e+07	27117092	1485215	768057	6311206		292140		103299		655559				36732568	2.3675	0.387451	0.990211	0.799573	18.6717	-1.28277	4.87589	8.48212e+06	1.51481e+06	1.58315e+06	1.28405e+06	357667	1932.16	1.32237e+07	26708101	1392610	851441	5433006	678399	233820
Rock Creek West	RCW2b	6	8	7	74.5	72.5	73.5	Coal	2.23561e+07	3.68175e+06	4.24518e+06	3.65851e+06	645780	0	3.45873e+07	111136730	5953666	3474631	19688367		1031449		473227		1951519				143709589	1.8671	0.240675	0.99516	0.838949	20.7264	-1.27895	4.88542	2.31765e+07	3.82123e+06	4.32893e+06	3.69328e+06	689812	42026.2	3.57517e+07	112289600	5549716	3131361	19406324		835879
Rock Creek West	RCW3	8	10.5	9.25	72.5	70	71.25	Coal	9.02671e+06	1.56621e+06	1.57545e+06	1.20259e+06	631138	0	1.40021e+07	30694143	1770518	977483	7958683		348900		168468		986900				42905095	4.50745	0.32635	0.984328	0.779445	17.6214	-1.27191	4.90293	9.95065e+06	1.70171e+06	1.72957e+06	1.24187e+06	680541	11013.2	1.53154e+07	30870273	2130968	1026159	8046424		374477
Rock Creek West	RCW4	10.5	12.5	11.5	70	68	69	Coal	3.1596e+06	476308	431151	282733	574183	0	4.92398e+06	5972943	329911	168315	1814912		67647		16462		225028				8595218	11.661	0.572874	0.933134	0.75288	16.2353	-1.30439	4.82207	3.31701e+06	506983	471273	318099	649529	0	5.26289e+06	6542011	433787	188280	1805116		59811
Rock Creek West	RCW5	12.5	15.5	14	68	65	66.5	Coal	2.26528e+06	177583	160239	60988.3	158664	0	2.82275e+06	2637312	208865	107203	674994	85923	20256	15579	4702	6879	115480				3877193	5.62091	0.72804	0.956795	0.783637	17.8402	-1.01568	5.54096	2.4321e+06	203166	196420	76214.9	160237	0	3.06813e+06	3154501	312383	163181	967378		39163
Rock Creek West	RCW6	15.5	17.5	16.5	65	63	64	Shale	791631	74304	78650.3	42281.4	38426.8	0	1.02529e+06	1219501	141072	71524	325405		14082		5109		35298	5407			1817398	3.74788	0.564155	0.976339	0.790344	18.1902	-0.993073	5.59725	784528	79207.9	84726.4	54588.7	45819.7	0	1.04887e+06	1632894	188536	102661	415728		28329
Rock Creek West	RCW7	17.5	20	18.75	63	60.5	61.75	Shale	2.51257e+06	229312	233105	131036	52076	0	3.1581e+06	2586980	286927	163817	739733		47653		20814		107228				3953152	1.64897	0.798881	0.985061	0.768431	17.0467	-1.01129	5.55188	2.46871e+06	205471	231833	115588	43848.1	0	3.06545e+06	2892886	318520	160408	796994		48948
Rock Creek West	RCW8a	20	21	20.5	60.5	59.5	60	Shale	1.26059e+06	101144	113742	63126.3	29561.6	0	1.56816e+06	1758841	200217	117400	450566		28710		12097		55826	6280			2629937	1.88511	0.596274	0.987153	0.791437	18.2472	-0.983663	5.62068	1.20095e+06	110631	113709	69624.2	27796.2	0	1.52271e+06	2133689	225433	139798	543134		24565
Rock Creek West	RCW8b	21	24	22.5	59.5	56.5	58	Shale	1.30715e+06	112659	126411	68502.9	35396.8	0	1.65012e+06	2133146	231551	142261	531744		25902		6301		87529				3158434	2.1451	0.52245	0.987303	0.793734	18.3671	-1.02902	5.50775	1.34301e+06	127380	139968	77943.8	30865.6	0	1.71917e+06	2620149	301554	178435	675408		34482
Rock Creek West	RCW9	24	27.5	25.75	56.5	53	54.75	Shaley Coal	1.52404e+07	1.26602e+06	1.49474e+06	1.01135e+06	120199	0	1.91327e+07	24718457	2713188	1456427	5477408		400131		211113		711161		22889		35710774	0.628235	0.535769	0.996126	0.809464	19.1879	-0.996834	5.58788	1.47902e+07	1.50318e+06	1.52062e+06	1.07562e+06	148044	2370.51	1.90401e+07	25821453	2718920	1468743	6111420		461168
Rock Creek West	RCW10	27.5	30.5	29	53	50	51.5	Shale	2.98015e+06	279728	321189	184569	48118.1	0	3.81376e+06	4033440	585333	329771	1060903		61279	27849	50118	8600	187081		17530		6361904	1.2617	0.599468	0.990971	0.784496	17.885	-0.893794	5.84445	3.13271e+06	307105	358639	228972	50484.6	0	4.07791e+06	4601522	575835	356246	1128715		94811
Rock Creek West	RCW11	30.5	33	31.75	50	47.5	48.75	Shaley Coal	5.79855e+07	1.20258e+07	1.57277e+07	1.48939e+07	1.29155e+06	0	1.01924e+08	452518496	88536909	52330031	53530617		4000812		2199301		3816202				656932368	1.26716	0.155152	0.997473	0.903267	24.0825	-0.741137	6.22457	6.16831e+07	1.35718e+07	1.80729e+07	1.60802e+07	1.34305e+06	0	1.10751e+08	448794951	81949058	48346737	53986870		3567932
Rock Creek West	RCW12a	33	34.5	33.75	47.5	46	46.75	Coal	9.0617e+07	1.99173e+07	2.54203e+07	2.03963e+07	1.39896e+06	124572	1.57875e+08	434381191	55349724	32927830	60104111		4620000		2348411		5067933				594799200	0.886123	0.265425	0.997207	0.878715	22.8013	-0.92065	5.77758	9.4311e+07	2.07879e+07	2.53029e+07	2.17732e+07	1.48899e+06	40307.6	1.63704e+08	464174360	54199599	31173618	58998623		4183703
Rock Creek West	RCW12b	34.5	38	36.25	46	42.5	44.25	Coal	5.48254e+07	1.14019e+07	1.52613e+07	1.24165e+07	840174	0	9.47452e+07	295182665	55948578	29110129	32834958		2124750		1109713		2159888				418470681	0.886771	0.226408	0.997462	0.908645	24.3631	-0.754771	6.19062	5.53589e+07	1.07359e+07	1.40176e+07	1.34106e+07	959895	0	9.44828e+07	275433015	49375747	25476228	29673009		2093559
Rock Creek West	RCW13	38	39	38.5	42.5	41.5	42	Coal	6.59907e+07	1.06502e+07	1.23723e+07	8.78404e+06	2.2259e+06	255158	1.00278e+08	270974437	42342694	16600950	45952777		4002565		1719355		4211695				385804473	2.21973	0.25992	0.993116	0.855143	21.5714	-0.840688	5.97669	6.72711e+07	1.12164e+07	1.18591e+07	9.0105e+06	2.33828e+06	253655	1.01949e+08	268388435	39708407	16568649	43067981		4079094
Rock Creek West	RCW14	39	41.5	40.25	41.5	39	40.25	Coal	9.96507e+07	1.26621e+07	1.37312e+07	9.7553e+06	1.7223e+06	114892	1.37636e+08	342393169	60051927	23427989	63062331		5536294	2162352	2540591		6086541	3112665			508373859	1.25134	0.270739	0.995864	0.8465	21.1204	-0.763993	6.16766	9.88843e+07	1.31427e+07	1.48293e+07	9.99189e+06	1.63192e+06	87128.7	1.38567e+08	326335682	56059820	22353514	61184956		7504017
Rock Creek West	RCW15a	41.5	43	42.25	39	37.5	38.25	Coal	8.59796e+07	1.40475e+07	1.76661e+07	1.43048e+07	870415	3899.49	1.32872e+08	368748657	51873489	26183183	38335359		3755456		1779198		3047403	840367			494563112	0.655076	0.268666	0.997887	0.904972	24.1714	-0.861111	5.92583	8.85834e+07	1.43865e+07	1.90221e+07	1.54806e+07	924859	10848.8	1.38408e+08	378939024	51897118	27098232	36560038		2947108
Rock Creek West	RCW15b	43	45	44	37.5	35.5	36.5	Coal	4.50661e+07	5.41137e+06	6.33295e+06	4.76639e+06	1.30556e+06	81162.5	6.29636e+07	240206057	38987269	15829629	41911165		4527783		1950061		3885624	1471948			348769536	2.07352	0.180531	0.995479	0.849482	21.276	-0.803283	6.06982	4.17927e+07	5.60985e+06	7.20824e+06	5.34123e+06	1.53187e+06	57842.8	6.15417e+07	279408662	41709000	17287199	43576712		5461159
Rock Creek West	RCW16	45	47.5	46.25	35.5	33	34.25	Coal	8.76545e+07	1.70209e+07	2.32999e+07	2.16445e+07	756610	0	1.50376e+08	4.56314e+08	8.64532e+07	4.9695e+07	3.51593e+07		3.21057e+06		1.56326e+06		1.78639e+06				6.34181e+08	0.503144	0.237119	0.998468	0.934215	25.6973	-0.740458	6.22626							0
Rock Creek West	RCW17	47.5	49.5	48.5	33	31	32	Coal	7.09255e+07	1.85242e+07	2.40266e+07	2.05249e+07	924802	0	1.34926e+08	307282538	31472286	18259741	40421637		2290227		1338674		2210725				403275828	0.685415	0.334575	0.997364	0.885286	23.1442	-1.01553	5.54134	7.50092e+07	1.91008e+07	2.27174e+07	2.05989e+07	985643	0	1.38412e+08	288088430	31350963	17978555	37337423		2144533
Rock Creek West	RCW18a	49.5	52	50.75	31	28.5	29.75	Coal	4.55052e+06	875123	1.10399e+06	936180	3639.43	0	7.46945e+06	34267572	2050336	1426483	2307178		109102		20134		54267				40235072	0.0487242	0.185645	0.999901	0.938097	25.8999	-1.22948	5.00858	4.06593e+06	887407	1.02905e+06	866640	0	0	6.84902e+06	29810849	2037786	1360384	2030320		65255
Rock Creek West	RCW18b	52	54.5	53.25	28.5	26	27.25	Coal	5.16092e+07	1.36565e+07	1.63734e+07	1.42231e+07	424130	0	9.62864e+07	213785162	22245516	14304071	30621432		1819342		964188		1717193				285456904	0.440488	0.337306	0.99828	0.876962	22.7099	-1.00977	5.55567	249860	1.32957e+07	1.55439e+07	1.41006e+07	249860	0	4.34398e+07	204908192	18729373	12063209	26553443		1461149
Rock Creek West	RCW19	54.5	56	55.25	26	24.5	25.25	Coal	1.55404e+06	277799	343613	256941	2989.7	0	2.43539e+06	17177822	751109	336327	727390		9046								19001694	0.122761	0.128167	0.999833	0.961244	27.1077	-1.37208	4.65353	3.26804e+06	616268	767563	594971	0	0	5.24684e+06	39473435	1743926	741577	1770186		11070
Rock Creek West	RCW20	56	59	57.5	24.5	21.5	23	Coal	6110.93	0	0	892.014	1567.08	0	8570.03	1186365	149334	104035	57089				1814		23076				1521713	18.2856	0.00563183	0.998764	0.946127	26.3189	-0.928457	5.75814	42779.7	1251.15	1369.41	0	10261.3	0	55661.6	2702539		267266	180331
Rock Creek West	RCW21	59	62	60.5	21.5	18.5	20	Coal	1.60967e+08	2.70421e+07	3.18678e+07	2.38617e+07	620979	0	2.44359e+08	699471871	74155276	37986127	49954566		4820257		2146877		4175518				872710492	0.254126	0.28	0.999177	0.929991	25.477	-0.979649	5.63067	1.56425e+08	2.67417e+07	3.08693e+07	2.2369e+07	630419	2859.12	2.37038e+08	688407006	62595046	36284885	49657168		4086194
Rock Creek West	RCW22	62	64.5	63.25	18.5	16	17.25	Coal	8.30807e+07	1.40279e+07	1.57474e+07	1.14732e+07	632899	18658.2	1.24981e+08	400874344	49105783	25546358	31653471	2675351	386591		1351293		2353512	1210740			515157443	0.506397	0.242607	0.99856	0.930086	25.4819	-0.911005	5.8016	8.24631e+07	1.46119e+07	1.56973e+07	1.09407e+07	641882	21194	1.24376e+08	389103057	44777436	25582292	32466094		2864682
Rock Creek West	RCW23	64.5	68	66.25	16	12.5	14.25	Coal	3.14038e+07	4.6953e+06	5.33335e+06	3.76149e+06	389805	6861.51	4.55906e+07	114027570	21399918	9819497	11538611		1628717	693876	676137		1225834	670737			161680897	0.85501	0.281979	0.996951	0.906003	24.2252	-0.715822	6.2876	3.41324e+07	5.44385e+06	6.09877e+06	4.10256e+06	452379	16337	5.02463e+07	125429801	20199938	9988094	12504494		2096360
Rock Creek West	RCW24	68	70.5	69.25	12.5	10	11.25	Coal	3.87147e+07	6.36671e+06	7.45539e+06	6.14132e+06	428333	0	5.91065e+07	199609267	31244367	17121352	14924928		2284451		719531		1067207	401390			267372493	0.72468	0.221064	0.998021	0.928846	25.4172	-0.803065	6.07037	3.8621e+07	6.1258e+06	7.57247e+06	5.96087e+06	458056	1557.39	5.87397e+07	198170428	27573025	17657253	12884096		1921379
Rock Creek West	RCW25	70.5	73.5	72	10	7	8.5	Coal	2.83771e+07	4.24568e+06	5.32084e+06	3.89024e+06	144707	0	4.19786e+07	169215150	28860772	16586123	13973713		1558517		666061		1130254	454168			232444758	0.344716	0.180596	0.999217	0.925305	25.2324	-0.775985	6.1378	2.63814e+07	4.01424e+06	5.1409e+06	4.04625e+06	137084	0	3.97199e+07	172032499	27077934	16752197	12544545		1829604
Rock Creek West	RCW26	73.5	75.5	74.5	7	5	6	Coal	2.14212e+07	3.47571e+06	4.47059e+06	4.04795e+06	207361	0	3.36228e+07	242286024	34101573	23547010	12545371		1650473		601872	48643	853136	372719			316006821	0.616728	0.106399	0.999191	0.950407	26.5422	-0.849899	5.95375	2.04511e+07	3.37831e+06	4.44369e+06	3.60896e+06	242378	0	3.21245e+07	231657437	28402633	22611524	12000467	1242246
Rock Creek West	RCW27	75.5	78	76.75	5	2.5	3.75	Coaley shale	18917.6	0	0	0	0	0	18917.6	5013649	632380	406345	118869						37594				6208837	0	0.00304688	1	0.9748	27.8151	-0.912522	5.79782	39755.9	0	1761.17	917.884	926.89	0	43361.8	5693544	848367	420458	161603
Rock Creek West	RCW28a	78	79	78.5	2.5	1.5	2	Coaley shale	122697	5942.12	0	0	0	0	128639	4230810	473267	194348	213919	49554									5161898	0	0.0249209	1	0.958156	26.9466	-0.929492	5.75556	126230	8080.26	1206.55	0	0	0	135517	4182165	531520	230201	345435
Rock Creek West	RCW28b	79	81	80	1.5	-0.5	0.5	Ir-Clay
Rock Creek West	RCW29	81	82.5	81.75	-0.5	-2	-1.25	Coaley shale	135765	5885.72	10174.9	3487.53	1443.96	0	156757	5465639	1108691	659981	235996	25326					7002				7502635	0.921145	0.0208936	0.999748	0.967502	27.4343	-0.701913	6.32224	127259	8441.64	7141.44	7166.48	0	0	150008	5441749	1047065	582661	283365		18229
Rock Creek West	RCW30	82.5	86.5	84.5	-2	-6	-4	Coaley shale	141601	1274.66	3430.86	958.736	3016.35	0	150282	9016341	2813806	1409586	333490	44018	78440		116658		9815				13822154	2.00713	0.0108725	0.999679	0.960923	27.091	-0.503464	6.81637	154226	4390.23	920.326	0	0	0	159536	8806733	2560361	1539163	433284		73637
Wood Mountain Creek	8_07_1	27	28.5	27.75	61	59.5	60.25	Coaley shale	14518						14518	15190	1576		6428										23194	0	0.625938	1	0.722859	14.6688	-1.13726	5.23822	18685						18685	34371			13896
Wood Mountain Creek	8_07_2	28.5	30	29.25	59.5	58	58.75	Coaley shale
Wood Mountain Creek	8_08_1	30	31.5	30.75	58	56.5	57.25	Shaley Coal	620694	112616	153227	126210	43490	3296	1059533	2259075	332645	246334	379564		23897		19293						3260808	4.10464	0.32493	0.983785	0.870353	22.365	-0.869269	5.90552	807930	150293	174237	174768	43250		1350478	2828979	432134	255631	367538		37138
Wood Mountain Creek	8_08_2	31.5	33	32.25	56.5	55	55.75	Shaley Coal	149176	17039	10931	24956			202102	504723	67937	45592	70446		2560				4370				695628	0	0.290532	1	0.888768	23.3259	-0.914912	5.79187	26573	27844	31668	29997			116082	505885	69269	52103	65080		2529
Wood Mountain Creek	8_09_1	33	34.5	33.75	55	53.5	54.25	Coal	301188	94273	102309	96110	2799		596679	1332044	126917	75278	205899		10865		7378		10947				1769328	0.469096	0.337235	0.998196	0.867131	22.1969	-1.05083	5.45344	345363	105941	105836	129699	3294		690133	1262411	146549	74187	166324		11284
Wood Mountain Creek	8_09_2	34.5	36	35.25	53.5	52	52.75	Coal	589125	99263	108293	103472	5344		905497	1017368	158016	90063	203120		21477		8389		24058				1522491	0.590173	0.594747	0.995724	0.831169	20.3204	-0.840963	5.976	525740	83913	107531	105350	8986		831520	1050718	185200	82049	263880		21384
Wood Mountain Creek	8_10_1	36	37.5	36.75	52	50.5	51.25	Coal	74096	54169	11428	25839			165532	787456	100856	52470	186084		12063				22490				1161419	0	0.142526	1	0.810028	19.2173	-0.945505	5.71569	348689	54897	67216	50378	2983		524163	719388	97439	46618	161633		8545
Wood Mountain Creek	8_10_2	37.5	39	38.25	50.5	49	49.75	Coal	583041	101162	126115	123700	16913		950931	1353485	218361	88522	287102		21232		10887		21693				2001282	1.77857	0.475161	0.989928	0.829652	20.2413	-0.84123	5.97534	618009	118406	119932	131180	13744		1001271	1191823	163360	109717	266550		17651
Wood Mountain Creek	8_11_1	39	40.5	39.75	49	47.5	48.25	Coal	75166	25167	19492	16822			136647	2401998	240072	165965	241069		26367		16370		31652				3123493	0	0.0437481	1	0.899005	23.8601	-1.00168	5.57582	102416	15303	20844	19894	2035		160492	2168361	235128	152272	263424		21322
Wood Mountain Creek	8_11_2	40.5	41.5	41	47.5	46.5	47	Coal	341231	78772	94969	84209	4823		604004	5049317	444589	308470	611178		29083		20400		30129				6493166	0.798505	0.0930215	0.999153	0.893613	23.5787	-1.07968	5.38159	704320	53579	76579	106605	8123		949206	4882594	714247	324377	714398		36612
Wood Mountain Creek	8_11_3	41.5	43.5	42.5	46.5	44.5	45.5	Coal	55389	10289	11284	13246			90208	533866	52579	61373	54109						2195				704122	0	0.128114	1	0.920037	24.9575	-1.05016	5.45509	157359	36865	43419	51357	3595		292595	871121	83499	57089	104884		6177
Wood Mountain Creek	8_12_1	43.5	44.5	44	44.5	43.5	44	Coal	1059931	300763	328905	314588	11117		2015304	3857399	357551	218052	716898		35296		19318		73637				5278151	0.551629	0.38182	0.997614	0.839878	20.7748	-1.07304	5.39814	1486016	407471	339943	442147	19583		2695160	5712043	461498	323564	1083994		53910
Wood Mountain Creek	8_12_2	44.5	46.5	45.5	43.5	41.5	42.5	Coal								12241751	563093	252227	2370396		77377		33266		141554				15679664		0	1	0.832739	20.4023	-1.3624	4.67762
Wood Mountain Creek	8_12_3	46.5	47.5	47	41.5	40.5	41	Coal	77529	17865	20009	17677			133080	229734	16442	9056	35008		383				1672				292295	0	0.455293	1	0.8732	22.5136	-1.1996	5.08299	91266	21864	21456	20582			155168	231290	15697	9896	42176		759
Wood Mountain Creek	8_13_1	47.5	48.5	48	40.5	39.5	40	Coal	368051	56208	62374	51641			538274	1892726	161012	110008	271118		23711		19150		24732				2502457	0	0.215098	1	0.864649	22.0674	-1.07364	5.39663	562852	38624	28274	19923	530		650203	1923770	172448	128792	298145		24183
Wood Mountain Creek	8_13_2	48.5	49.5	49	39.5	38.5	39	Coal	1240399	215971	227093	176210	5183		1864856	2352248	177799	139483	470166		22175		12876		32248				3206995	0.27793	0.581496	0.998188	0.832409	20.3851	-1.15458	5.19509	1484248	193312	212076	184693			2074329	2759534	228999	147940	501382		25310
Wood Mountain Creek	8_14_1	49.5	51	50.25	38.5	37	37.75	Coal	248029	22442					270471	1014958	83650	78634	136102		10497								1323841	0	0.204308	1	0.889262	23.3517	-1.08729	5.36264	126009	8905	4356	7732	4929		151931	1784254	248145	107811	270173		46132
Wood Mountain Creek	8_14_2	51	52	51.5	37	36	36.5	Coal	554792	110891	152564	143949	5091		967287	3197715	323460	191064	349174		20701		17670		20345				4120129	0.526317	0.234771	0.998575	0.901001	23.9642	-1.01557	5.54123	483817	129715	160424	166010	6747		946713	3081128	356785	190205	353617		19481
Wood Mountain Creek	8_14_3	52	53	52.5	36	35	35.5	Coal	1225836	400398	490032	472846	18664		2607776	8256307	1381094	859930	1246837		90170		60981		86882				11982201	0.715706	0.217637	0.998058	0.876077	22.6637	-0.814129	6.04282	1429750	503749	447826	530520	13523		2925368	10028349	1664141	915236	1378390		113178
Wood Mountain Creek	8_15_1	53	54.5	53.75	35	33.5	34.25	Coal	160093	39475	56383	54844			310795	986470	132646	74153	90155		8657		14046		3492				1309619	0	0.237317	1	0.911157	24.4942	-0.883319	5.87053	134464	41196	53795	55506			284961	1321693	143581	93363	120303		6783
Wood Mountain Creek	8_15_2	54.5	56	55.25	33.5	32	32.75	Coal	1068293	274303	339415	334619	13658		2030288	7406784	1285335	689545	664219		48324		37306		38563				10170076	0.672712	0.199634	0.998319	0.922477	25.0849	-0.783953	6.11796	986994	281573	379632	363394	15102		2026695	7270672	1177740	697581	675837		75480
Wood Mountain Creek	8_16_1	56	57.5	56.75	32	30.5	31.25	Coal	1946569	418443	587750	532474	12609		3497845	8292840	1261926	878699	952687		74768		66682		53978				11581580	0.360479	0.302018	0.998646	0.900867	23.9572	-0.842428	5.97235	1818306	441873	651668	519107	26702		3457656	8872838	1333291	782301	1089129		80642
Wood Mountain Creek	8_16_2	57.5	59	58.25	30.5	29	29.75	Coal	2032662	571380	515782	524630			3644454	11944923	1899539	978423	1506507		104241		78812		93591				16606036	0	0.219466	1	0.89262	23.5269	-0.82993	6.00348	2120656	519482	750760	669156			4060054	15615541	2522084	1272782	1918724		119101
Wood Mountain Creek	8_17_1	59	60.5	59.75	29	27.5	28.25	Coal	2094624	461365	609377	437592	29877		3632835	9802686	1380736	731417	1328639		96651		58607		148342				13547078	0.822416	0.268164	0.997358	0.879514	22.843	-0.882802	5.87182	1934903	491850	552501	542100			3521354	10177462	1388070	896001	1695138		97111
Wood Mountain Creek	8_17_2	60.5	62	61.25	27.5	26	26.75	Coal	2101129	534538	556793	515017	14168		3721645	7682702	678729	469459	1179226		61045		52412		80453				10204026	0.380692	0.364723	0.998418	0.865432	22.1082	-1.08235	5.37494	1774414	484850	553145	496106	12839		3321354	7308626	738059	434691	1340669		80719
Wood Mountain Creek	8_17_3	62	64	63	26	24	25	Coal	425887	134324	137896	96825			794932	1625704	136009	83119	287204		14593		18546		618435				2783610	0	0.285576	1	0.662748	11.5322	-1.22552	5.01845
Wood Mountain Creek	8_18_1	64	65.5	64.75	24	22.5	23.25	Coal	121086	26272	15858	15426	1416		180058	395225	40650	16208	49421				2261		4305				508070	0.786413	0.354396	0.996856	0.889805	23.38	-1.04314	5.47259	104669	25069	22847	16550			169135	412353	39353	17684	51498
Wood Mountain Creek	8_18_2	65.5	67	66.25	22.5	21	21.75	Coal	1497712	329504	274807	372521	18399		2492943	3769015	294702	207844	797956		39276		29555		83134				5221482	0.738043	0.47744	0.996059	0.818074	19.6371	-1.14374	5.22208	1521211	350516	282473	237793	10865		2402858	4083531	369104	195546	868710		57116
Wood Mountain Creek	8_18_3	67	68.5	67.75	21	19.5	20.25	Coal	447086	121098	124986	134713	3593		831476	1590201	149659	90834	267081		14987		16758		18154				2147674	0.432123	0.387152	0.998088	0.852408	21.4286	-1.05655	5.43919								1486879	122555	83025	250895		11431
Wood Mountain Creek	8_19_1	68.5	70.5	69.5	19.5	17.5	18.5	Coal	335188	46581	66314	25050			473133	1604933	147631	79653	172029		29692				29727				2063665	0	0.229268	1	0.887846	23.2778	-1.00812	5.55979	305775	48621	24787	19562			398745	1607052	142332	80736	200960		19999
Wood Mountain Creek	8_19_2	70.5	72.5	71.5	17.5	15.5	16.5	Coal	296561	47114	30152	27174			401001	2783357	329552	175902	312497		52285		31366						3684959	0	0.108821	1	0.892496	23.5204	-0.908902	5.80683	271011	38679	36486	33735			379911	2874051	264009	154888	284640		45324
Wood Mountain Creek	8_20_1	72.5	73.5	73	15.5	14.5	15	Coal	468290	62980	50272	43108	11041		635691	1323486	116260	62905	131432										1634083	1.73685	0.38902	0.992468	0.919568	24.9331	-1.09741	5.33745	505640	45428	49682	36346	12167		649263	1284167	107551	69325	129903
Wood Mountain Creek	8_20_2	73.5	74.5	74	14.5	13.5	14	Coal	137628	30260	18143	7909			193940	412873	35746	22139	45553										516311	0	0.375626	1	0.911772	24.5263	-1.10804	5.31098	110816	28129	15559	7032			161536	542907	46061	21912	53778
Wood Mountain Creek	8_20_3	74.5	76	75.25	13.5	12	12.75	Coal
Wood Mountain Creek	8_20_4	76	77	76.5	12	11	11.5	Coal	453260	60808	49660	44922	6415		615065	1626163	215285	119511	227876		35093								2223928	1.04298	0.276567	0.996552	0.881755	22.96	-0.869523	5.90489	543681	54009	59378	43563	4380		705011	1724358	196394	97138	236876		36045
Wood Mountain Creek	8_20_5	77	78	77.5	11	10	10.5	Coal	382132	78560	73464	18869	9988		563013	2582511	246686	132089	332250										3293536	1.77403	0.170945	0.996585	0.899121	23.8661	-1.07246	5.39958	350101	134496	78941	28175	15025		606738	2267527	341524	163310	399049		210787
Wood Mountain Creek	8_20_6	78	79	78.5	10	9	9.5	Coal	424407	27464	33466	14030	33617		532984	807226	95062	37888											940176	6.30732	0.566898	0.96002	1	29.13	-0.928988	5.75682	332019	21514	27014	16017	25593		422157	824727	114172	52222
Wood Mountain Creek	8_21_1	79	80	79.5	9	8	8.5	Coal	606126	46893	39229	28264			720512	1159876	233600	73934	200297										1667707	0	0.432038	1	0.879897	22.863	-0.765121	6.16485	522287	45712	34176	43980			646155	1747150	317777	105935	201172
Wood Mountain Creek	8_21_2	80	81	80.5	8	7	7.5	Coal								368990	100922	21685	176567		94820		183493						946477		0	1	0.519397	4.05212	-0.445156	6.96156								393689	96501	32808	75273
Wood Mountain Creek	8_21_3	81	82	81.5	7	6	6.5	Coal	380389	24920	23311	9158	13985		451763	601901	106362	29100	109237										846600	3.09565	0.53362	0.980714	0.87097	22.3972	-0.825167	6.01533	275626	23880	13923	7415	13360		334204	548413	118711	36977	75580
Wood Mountain Creek	8_21_4	82	83	82.5	6	5	5.5	Coal	292973	38837	35982	15092	24410		407294	748929	211572	43458	115370										1119329	5.99321	0.363873	0.972533	0.896929	23.7518	-0.611206	6.5481	431874	65762	42031	16282	25635		581584	704000	183399	59037	114103
Wood Mountain Creek	8_21_5	83	84	83.5	5	4	4.5	Coal	93301	6989			2374		102664	222015	52087	18952											293054	2.3124	0.350325	0.98942	1	29.13	-0.629653	6.50216	1145332	8035	6264		3080		1162711	170300	37912	13406	35591
Wood Mountain Creek	8_22_1	84	85	84.5	4	3	3.5	Coal	16935						16935	16438	8395	5935	3095										33863	0	0.500103	1	0.908602	24.3609	-0.366748	7.1568	12353						12353	139491	46398	15603
Wood Mountain Creek	8_22_2	85	86	85.5	3	2	2.5	Coal	8761						8761	21825													21825	0	0.40142	1	1	29.13			42198	2893	2354				47445	58316	8560
Wood Mountain Creek	8_22_3	86	86.5	86.25	2	1.5	1.75	Coal	33022	842					33864	37376			20914										58290	0	0.580957	1	0.641208	10.4082			34801	1047					35848	23271	5138	2905
Wood Mountain Creek	8_23_1	86.5	87	86.75	1.5	1	1.25	Coal	1385						1385	207932	11035	2714	15658										237339	0	0.00583553	1	0.934027	25.6875	-1.30668	4.81637	5844						5844	285225	23051
Wood Mountain Creek	8_23_2	87	87.5	87.25	1	0.5	0.75	Shale
Wood Mountain Creek	8_23_3	87.5	88	87.75	0.5	0	0.25	Ir-Clay
Wood Mountain Creek	8_25_1	88	89	88.5	0	-1	-0.5	Coal
Wood Mountain Creek	8_25_2	89	90	89.5	-1	-2	-1.5	Coal	846						846	37342			1186										38528	0	0.0219581	1	0.969217	27.5238										45413			3424
Wood Mountain Creek	8_26_1	90	91.5	90.75	-2	-3.5	-2.75	Coal	3886						3886	65529	2359	1609	3177						843				73517	0	0.0528585	1	0.945319	26.2767	-1.46956	4.41079	3198			263	486		3947	70547	2987	889	5281
Wood Mountain Creek	8_26_2	91.5	93	92.25	-3.5	-5	-4.25	Coal	83817	8699	8732	5061	5058		111367	423332	30411	5794	61020		5062				10059				535678	4.54174	0.207899	0.989873	0.857861	21.7132	-1.14419	5.22097	90305	9249	9925	7053	5049		121581	445376	26387	6678	60037		5741
Wood Mountain Creek	8_26_3	93	94.5	93.75	-5	-6.5	-5.75	Coal	19962	2407	1255	3530			27154	137258	27246		9943										174447	0	0.155658	1	0.943003	26.1559	-0.732608	6.24581	14599	2385	2169		2279		21432	416131	15667	4432	39274
Wood Mountain Creek	8_26_4	94.5	96	95.25	-6.5	-8	-7.25	Coal	265681	20955	17108	14408	1709		319861	1292104	95140	45092	242045		10999		10316		36171				1731867	0.534295	0.184691	0.998913	0.827047	20.1053	-1.17011	5.15642	282976	31428	27519	13123	1557		356603	1438477	108083	52887	280712		15391
Wood Mountain Creek	8_26_5	96	97.5	96.75	-8	-9.5	-8.75	Coal	213024	34308	35995	36311	6348		325986	2220620	127718	72987	204631										2625956	1.94732	0.12414	0.997389	0.922074	25.0638	-1.2785	4.88652	165752	32146	28931	21145	6110		254084	1866689	111434	61700	223090
Wood Mountain Creek	8_27_1	97.5	99	98.25	-9.5	-11	-10.25	Coal	159718	19804	15489	4993	215813	13546	429363	118578	7171		48386		28418				46738				249291	50.2635	1.72234	0.497543	0.504427	3.27098	-0.778493	6.13155	77063	9879	4337	973	92858	3504	188614	79132	6257	2472	37879		3284
Explanatory Notes
Proxy	Source	Formula
MBT'5Me (Columns AH, BJ, BQ)	De Jonge et al. 2015	MBT'5Me = (Ia+Ib+Ic)/(Ia+Ib+Ic+IIa+IIb+IIc+IIIa)
MAAT (Columns AI, BK, BR)	Naafs et al. 2017	MAAT = (52.18*MBT) - 23.05
CBTpeat (Columns AJ, BL, BT)	Naafs et al. 2018	CBT = (Ia+IIa'+IIb+IIb'+IIIa')/(Ia+IIa+IIIa)
pH (Columns AK, BM, BU)	Naafs et al. 2018	pH = (2.49*CBT) + 8.07
Hopane ratio (Column BV)	Inglis et al. 2018	C31 bb/(bb+ab)
The d13C values (columns BX–CE) for Wood Mountain Creek are also reported In Jerrett et al. (2015).
Blank cells (columns J–AC, AL–BE) denote below the detection limit/unquantifiable GDGTs.
[truncated: 33 more columns]

## Sheet: G50588
O’Connor, L.K., et al., 2023, Steady decline in mean annual air temperatures in the first 30 k.y. after the Cretaceous-Paleogene boundary: Geology, https://doi.org/10.1130/G50588.1
